# Supplementary material
Source: PubMed Central journal article supplement (PMC9447366)
Supplement: NIHMS1829899-supplement-Supplement.pdf [file NIHMS1829899-supplement-Supplement.pdf]

# Supplementary Material for: Confidence Intervals for Difference in Proportions for Matched Pairs Compatible with Exact McNemar's or Sign Tests

Michael P. Fay and Keith Lumbard

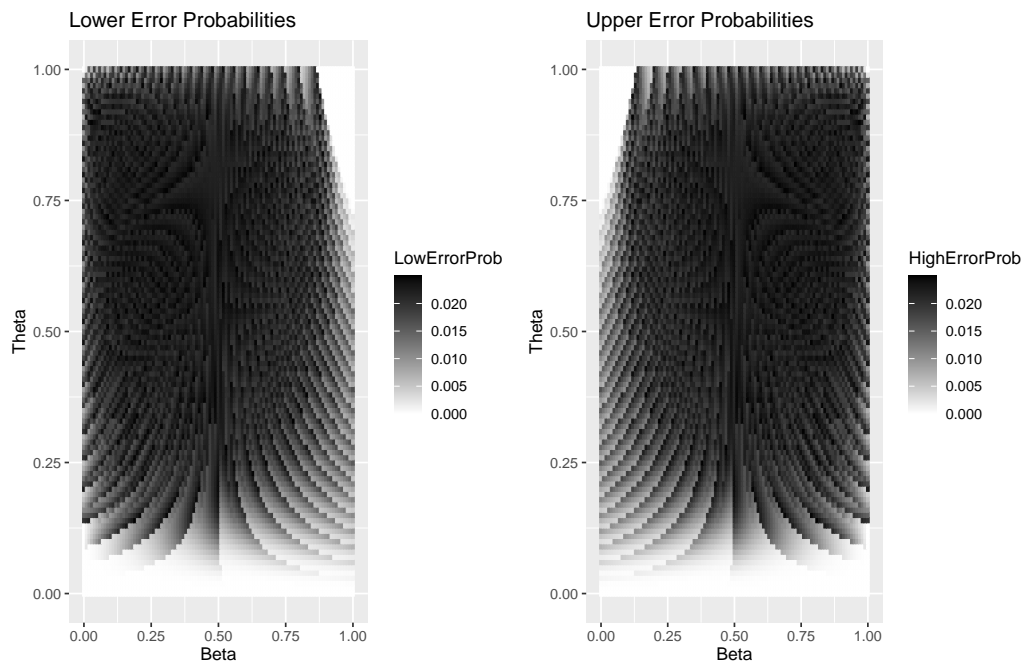

Figure S.1: Lower and upper errors from the 95% central Wang confidence interval for  $\Delta$  using the `ExactCliff` R package when  $n = 26$  for all values of  $\beta, \theta \in \{0, 0.01, 0.02, \dots, 1\}$ . All errors are less than the nominal 0.025.

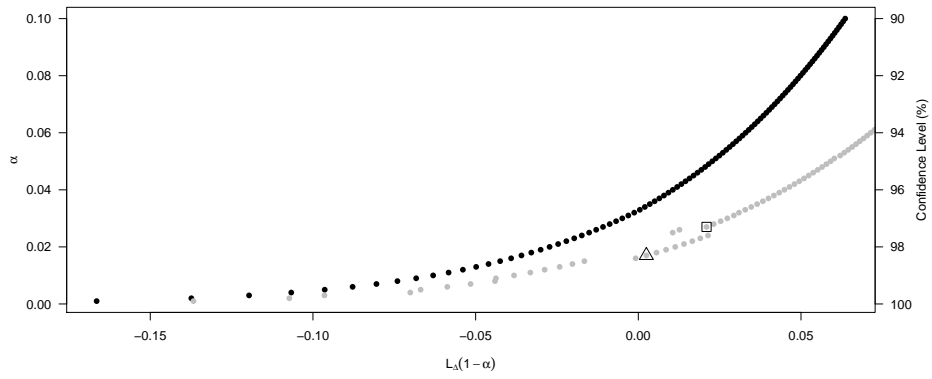

Figure S.2: Lower  $100(1-\alpha)\%$  confidence limits by  $\alpha \in \{0.001, 0.002, \dots, 0.100\}$  for the data  $x = 9$ ,  $m = 11$  and  $n = 26$ . Black dots are the lower limit for the melding interval,  $L_{\Delta}(1-\alpha)$ , and gray dots are the lower limit for the Wang interval,  $L_{\Delta}^W(1-\alpha)$ . The point outlined by a square is Wang's one-sided 97.3% limit,  $L_{\Delta}^W(0.973; 9, 11, 26) = 0.021$ , and the point outlined by a triangle is the one-sided 98.3% limit,  $L_{\Delta}^W(0.983; 9, 11, 26) = 0.0025$ .
